# Supplementary material for: Vinegar extract ameliorates alcohol-induced liver damage associated with the modulation of gut microbiota in mice
Source: Royal Society of Chemistry journal article supplement (doi:10.1039/c9fo03015h), 2020-01-01
Supplement: c9fo03015h2.pdf [file c9fo03015h2.pdf]

### Determination of vinegar extract

A high-performance liquid chromatography (HPLC) (Agilent Technologies Inc., Palo alto, California, USA) was used for identification and quantification of major bioactive compositions of vinegar extract. Briefly, SAVE samples were diluted with 50 % methanol (v/v), and injected into the HPLC system. Separation was performed by reverse phase column (Luna C18 (2), 250 × 4.6 mm, 4 μm, Phenomenex, Torrance, CA, USA). The gradient elution included water/acetic acid (98:2, v/v, solvent A) and water/acetonitrile/acetic acid (73:25:2, v/v/v, solvent B) as mobile phase at 1.00 mL/min. The elution time of solvent B was: 0-19 min, 4-5 % B; 46-59 min, 15-20 % B; 59-61 min, 10-20 % B, 64 min, 5 % B, and held for 5 min. The column temperature was 30 °C and the injected volume 20 μL, and ultraviolet detection wavelengths were 278 nm. Identification of bioactive compositions were performed by comparing their retention time with the standard compounds. The results were expressed as mg/L. As shown in Table S1, the bioactive compounds of SAVE mainly contained gallic acid, *p*-hydroxybenzoic acid, catechins, chlorogenic acid, vanillic acid, caffeic acid, syringic acid, *p*-coumaric acid, ferulic acid, sinapic acid and rutin. The content of catechins (176.06 ± 0.66 mg/L) was the highest among the compositions, followed by gallic acid (89.40 ± 0.10 mg/L), *p*-hydroxybenzoic acid (60.43 ± 0.33 mg/L), and caffeic acid (60.32 ± 0.01 mg/L).

**Table S1** The main bioactive compositions of vinegar extract <sup>1</sup>

| Compositions                  | Retention time (min) | Content (mg/L) |
|-------------------------------|----------------------|----------------|
| Catechins                     | 16.35 ± 0.12         | 176.06 ± 0.66  |
| Gallic acid                   | 6.06 ± 0.21          | 89.40 ± 0.10   |
| <i>p</i> -hydroxybenzoic acid | 14.75 ± 0.35         | 60.43 ± 0.33   |
| Caffeic acid                  | 20.22 ± 0.24         | 60.32 ± 0.01   |
| Chlorogenic acid              | 17.16 ± 0.25         | 22.55 ± 0.11   |
| <i>p</i> -coumaric acid       | 25.95 ± 0.15         | 14.34 ± 0.01   |
| Vanillic acid                 | 18.51 ± 0.14         | 12.55 ± 0.06   |
| Ferulic acid                  | 29.40 ± 0.30         | 10.22 ± 0.02   |

<sup>1</sup>Data in the table are represent mean  $\pm$  S.D. (n = 3).

### **Figure legend**

**Fig. S1.** The effect of SAVE on alcohol-induced liver damage in mice. H&E-stained liver tissues were observed by microscopy (400  $\times$  magnification) in control group (A), alcohol group (B), alcohol + SAVE (250 mg/kg b.w.) group (C), alcohol + SAVE (500 mg/kg b.w.) group (D), alcohol + SAVE (750 mg/kg b.w.) group (E).
