# Supplementary figures and images for: Vinegar extract ameliorates alcohol-induced liver damage associated with the modulation of gut microbiota in mice
Source: Royal Society of Chemistry journal article supplement (doi:10.1039/c9fo03015h), 2020-01-01

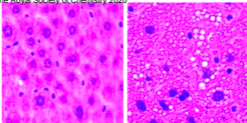

Alcohol +SAVE (250 mg/kg)

Alcohol +SAVE (500 mg/kg)

Alcohol +SAVE (750 mg/kg)

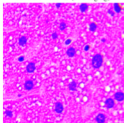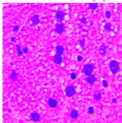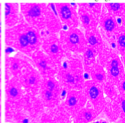

Supplement: c9fo03015h1.pdf [file c9fo03015h1.pdf]
